# Supplementary material
Source: PubMed Central journal article supplement (PMC1184539)
Supplement: bj3890073add.pdf [file bj3890073add.pdf]

**Table I**  
Exon-intron boundaries of the human *SPAG9* gene

| Exon | Size (bp) | Splice acceptor      | Splice donor          | Intron size (kb) |
|------|-----------|----------------------|-----------------------|------------------|
| 1.   | 39        |                      | GCTGACCAGAgtaagtaaaa  | 23.21            |
| 2.   | 71        | ttaattcagTTAGCAGACT  | ACACACTGAGgtgggttct   | 9.107            |
| 3.   | 95        | ttaaaatagATGATCCATA  | GTAGGATTAGgtaagctttg  | 5.968            |
| 4.   | 151       | cttcaaatagAAAAGAACGC | CAGCCTGAAGgtaagcttta  | 20.493           |
| 5.   | 208       | ttattttagGATGAGCTTT  | GTATCTACTGgtgagtgacc  | 1.206            |
| 6.   | 100       | ctttttaagGCTCTGCTGA  | AAGGTTCAAGgtaacataaa  | 6.026            |
| 7.   | 122       | tgttgcatagCACTCCCACC | GATTTACTAGgtatgatagc  | 7.084            |
| 8.   | 58        | cgtttgatagGAATGGGTCG | TGGAAACCAAgtaagtatat  | 1.241            |
| 9.   | 153       | tgttcttagAAATGCTTTG  | AGCTTAGGAAgtaagtttta  | 1.025            |
| 10.  | 52        | tccccactagAGCTCGGGCA | TGACGATGATgtaggtttac  | 3.548            |
| 11.  | 131       | gtcattatagAGTGATATTC | AGATGATTCGgtttgatga   | 2.184            |
| 12.  | 57        | ttgaatgtagGGCATCACGA | TTTGGCAGTTgtaagtattg  | 1.273            |
| 13.  | 174       | cttcttttagTTTCAGCCGA | TTAGTGAAGAgtaagtcttt  | 2.052            |
| 14.  | 130       | ttccttttagAACTGAAGCT | GTACAAACAGgtaaatatgca | 1.250            |
| 15.  | 90        | ccattattagGTAACCAATG | ATCAATGAAGgtaagttcat  | 0.476            |
| 16.  | 168       | acctgagaagCTGTGGTGTG | GGAACTTAAGgtaagtgtgt  | 1.460            |
| 17.  | 172       | tgccatacagGAACAGAAGG | AGTGTGCCAGgtaagagtga  | 3.485            |
| 18.  | 219       | tattttcagGTGCACGAGA  | AAACCACCAGgtatcatccat | 1.1280           |
| 19.  | 333       | tacttttagAAATGGAAGC  |                       |                  |
